# Supplementary material for: Elite party cues increase vaccination intentions among Republicans
Source: PubMed Central journal article supplement — Proc Natl Acad Sci U S A. 2021 Jul 26;118(32):e2106559118. doi: 10.1073/pnas.2106559118 (PMC8364165; doi:10.1073/pnas.2106559118), 2021-07-26
Supplement: pnas.2106559118.sapp.pdf [file pnas.2106559118.sapp.pdf]

*Supplementary Information*  
*for*  
*Elite Party Cues Increase Vaccination Intentions among Republicans*

**Essays**

*Essays from the Republicans Endorse / Democrats Endorse Conditions*

**The [Republican/Democratic] Leadership Has Been Critical to the Historic COVID-19 Vaccine Effort**

President [**Donald Trump/ Joseph Biden**] and his administration have led the effort to develop and deliver the COVID-19 vaccines, and are now encouraging all Americans to get vaccinated when they have the chance. [**“Everybody, go get your shot,” / “We need everyone to get vaccinated,”**] [**Trump/ Biden**] urged [**at the annual Conservative Political Action Conference / during a speech at the White House**].

History will remember that President [**Trump / Biden**], his administration, and many other leading [**Republicans/Democrats**] spearheaded the development and distribution of life-saving COVID-19 vaccines. Thanks to their support, these vaccines were rigorously tested with tens of thousands of people and were found to be highly effective at preventing people from suffering from COVID-19. Under the leadership of President [**Trump/Biden**], millions of Americans received the COVID-19 vaccine, and vaccinations increased significantly each week.

This is a historic feat of science, manufacturing, and operations that will be remembered as a hallmark of the [**Trump/Biden**] presidency -- and will save tens of thousands of lives. Because of the [**Trump/Biden**] administration, the United States has administered more COVID-19 vaccines than any other country in the world. In the end, we will all thank President [**Trump/Biden**] and [**Republican/Democratic**] leadership for their contributions to his historic effort that will save lives and restart our economy.

*Neutral Control Essay*

**Why do men wear ties?**

As with most things, the answer can be found in history. Neckties date back hundreds of years, coming into existence as the direct result of a war. In 1660, in celebration of its hard-fought victory over the Ottoman Empire, a regiment from Croatia (then part of the Austro-Hungarian Empire) visited Paris. The soldiers were presented as heroes to Louis XIV, a monarch well known for his tendency toward personal adornment. The officers of this regiment were wearing brightly colored handkerchiefs fashioned from silk around their necks. These neck cloths struck the fancy of the king, and he soon made them an insignia of royalty as he created a regiment of Royal Cravattes.

It wasn't long before this new style crossed the channel to England. Soon, no gentleman would have considered himself well-dressed without sporting some sort of cloth around his neck -- the more decorative, the better.

How can we account for the continued popularity of neckties? For years, fashion historians and sociologists predicted their demise -- the one element of a man's attire with no obvious function. Perhaps they are merely part of an inherited tradition. As long as world leaders continue to wear ties, the youth of the world will follow suit, and ties will remain a key component to any man's professional wardrobe.

### Videos

Transcripts of the videos are below. Links to full videos at <https://osf.io/rb3cn/>.

#### Republicans endorse

*Excerpt from speech by Donald Trump at the Conservative Political Action conference on February 28th, 2021.*

“When I left office -- and we're very proud of this because this was something that they said could not be done. The FDA said it; everybody said it. Any article you read said it. Couldn't be done, it would be years and years. I handed the new administration what everyone is now calling a modern day, medical, miracle. Some say it's the greatest thing to happen in hundreds of years, hundreds of years. Two vaccines produced in record time; others on the way, including the Johnson and Johnson vaccine that was approved just yesterday.

What the Trump administration has done with vaccines has in many respects perhaps saved large portions of the world. Not only in our country, but large portions of the world. It takes 60 to 100 days to manufacture and inspect new doses and that means that 100% of the increased availability that we have now was initiated by our administration. One hundred percent. In fact, the director of National Institutes of Health, Francis Collins -- he's Fauci's boss actually, I think he's a Democrat too by the way -- recently said that our Operation Warp Speed was absolutely breathtaking, and that the Trump administration deserves full credit. Which we do. Never let them forget that this was us. We did this, and the distribution is moving along according to our plan, and it's moving along really well. We had the military -- what they've done, our generals and all of the people, what they've done has been incredible, but remember, we took care of a lot of people. Including, I guess on December 31st we took care of Joe Biden. Because he got his shot, he got his vaccine, he forgot. It shows you how unpainful that vaccine shot is.

So everybody, go get your shot!”

*Video source: NewsNOW from FOX. (2021 February 18). “President Trump CPAC 2021 Full Speech | NewsNOW from FOX”. YouTube.*

#### Democrats endorse

*Excerpt from speech by Joseph Biden at the White House on March 11, 2021.*

“When I came into office, you may recall, I set a goal that many of you said was kind of, way over-the-top. I said I intended to get 100 million shots in people’s arms in my first 100 days in office. Tonight, I can say we’re not only going to meet that goal, we’re going to beat that goal. Because we’re actually on track to reach this goal of 100 million shots in arms on my 60th day in office. No other country in the world has done this. None.

I promise I will do everything in my power. I will not relent until we beat this virus. But I need you -- the American people -- I need you. I need every American to do their part. And that’s not hyperbole. I need you. I need you to get vaccinated when it’s your turn and you can find an opportunity. And to help your family, your friends, your neighbors get vaccinated as well. Because here’s the point: if we do all this, if we do our part, if we do this together, by July the 4th there’s a good chance you, your families, and friends will be able to get together in your backyard or in your neighborhood and have a cookout and a barbeque and celebrate Independence Day. That doesn’t mean large events with lots of people together, but it does mean small groups will be able to get together. After this long hard year, that will make this Independence Day something truly special. Where we not only mark our independence as a nation, but we mark our independence from this virus.”

*Video source: MSNBC. (2021 March 12). “Biden Sets May Vaccine Goal, Fourth Of July For Small Gatherings | Morning Joe | MSNBC”. YouTube.*

### Neutral control

*Excerpt from instructional video about how to tie a necktie.*

“To tie the simple knot, you will set up the ex, and then go behind, across, and out. So, let’s begin. Take the tie, place it around your neck with the seam side down. Cross the fat end over the skinny end, making an ex. Grab the center of the ex with your less dominant hand. If you’re a righty, use your left. If you’re a left, use your right. Take the fat end and wrap it behind the hole, keeping the seam side facing in. Take the fat end and wrap it across the hole, but keep your finger here. Take the fat end and make it go out of the hole. To finish up, put the fat end where your finger is. Pull it through, then tighten the knot, then tighten the loop. You’re done.”

*Video source: Tiehole (2014 June 17). “How to tie a tie 1 minute tutorial”. YouTube.*

## **Participants**

To complete the study quickly, we recruited participants through Amazon Mechanical Turk (56% of sample), Bovitz (35% of sample), and CloudResearch (9% of sample). A total of 1513 unique participants who self-identified as Republican or as Independents/Other who leaned Republican completed the survey. Of those, 1480 passed a pre-manipulation video attention check. The sample was 59% female, had a median age of 47 years, 50.7% had a college degree or graduate degree, and 23% had already received at

least one dose of a COVID-19 vaccine. Model results are unaffected by inclusion of dummy variables for the source of participants.

### **Analysis**

To model the effect of condition on our outcome variables, we used a linear regression with dummy variables for condition on three outcome variables: vaccine intentions (2 items, alpha = .96), attitudes towards the vaccine (4 items, alpha = .94), and willingness to encourage family and friends to vaccinate (2 items, alpha = .99). We also included variables controlling for age (continuous), gender (as a dummy variable), race (as dummy variables), highest level of education received (as dummy variables), and income (continuous). In the models predicting vaccine intentions, we also included dummy variables for pre-treatment vaccination intentions. The model for vaccination intentions only included vaccinated participants; the models for vaccination attitudes and encouragement intentions included both vaccinated and unvaccinated participants. To determine significance, we used the beta values associated with the dummy variables for condition, and p-values from two-tailed tests from the regression models. These models were all in our pre-registration.

### **Items**

#### **Pre-manipulation vaccination intentions**

##### **Vaccine status/intention**

Have you received at least one dose of the COVID-19 vaccine?

- Yes
- No

*[If NO to item above]:*

If a vaccine against COVID-19 were available to you, how likely would you be to choose to get vaccinated?

- Extremely likely
- Somewhat likely
- Somewhat unlikely
- Extremely unlikely

#### **Dependent variables, measured post-manipulation**

##### **Vaccination intentions**

*If participant has NOT received the vaccine:*

- When a COVID-19 vaccine becomes available to you, how likely are you to choose to get the vaccine? [0 (Extremely unlikely) - 100 (Extremely likely)]

*If participant has HAS NOT received the vaccine:*

If a COVID-19 vaccine were available to you, would you choose to get it...

- As soon as possible
- After at least some people I know
- After most people I know
- Would not get the COVID-19 vaccine

### **Vaccine attitudes**

How much do you agree with the following statements? [0 - Strongly Disagree to 100 - Strongly agree.]

- The benefits of COVID vaccines are much greater than the risks.
- Taking the COVID-19 vaccine will keep me from getting severely ill.
- People have a responsibility to get a COVID-19 vaccine when it is available to them.
- If a large majority of Americans get a COVID-19 vaccine, it would help the economy a lot.

### **Encouragement intentions**

- If you had a *family member* who was unsure whether to accept the COVID-19 vaccine, how likely would you be to encourage them to get the vaccine? [0 (*Extremely unlikely*) - 100 (*Extremely likely*)]
- If you had a *friend* who was unsure whether to accept the COVID-19 vaccine, how likely would you be to encourage them to get the vaccine? [0 (*Extremely unlikely*) - 100 (*Extremely likely*)]

### Potential mediators, measured post-manipulation

#### **Republican credit**

How much do you agree or disagree with the following statements? [0 - Strongly disagree to 100 - Strongly agree.]

- Donald Trump deserves significant credit for the development and distribution of the COVID-19 vaccine.
- The Republican Party deserves significant credit for the development and distribution of the COVID-19 vaccine.

#### **Republican want**

How much do you agree with the following statements? [0 - Strongly disagree to 100 - Strongly agree.]

- Donald Trump would want me to get the COVID-19 vaccine.
- The leaders of the Republican Party would want me to get the COVID-19 vaccine.

#### **Expected social norm among Republicans**

- What percentage of Republicans do you think will choose to get a COVID-19 vaccine by the end of August 2021?

### Additional items measured pre-manipulation

## **Support for Trump and Biden**

How much do you approve or disapprove of the job performance of the following US Presidents?

- Donald Trump
- Joe Biden

## **Party as a social identity**

- How important is being a Republican to you? [*1 (Not at all important) to 5 (Extremely important)*]
- How well does the term Republican describe you? [*1 (Not well at all) to 5 (Extremely well)*]

## *Additional items measured post-manipulation*

### **Booster vaccine**

*If participant has HAS received the vaccine:*

- A "booster" is a vaccine dose that helps improve your body's ability to fight an infection. If a booster vaccine for COVID-19 were offered to you in 6-12 months, how likely would you be to get the booster? [0% Extremely unlikely - 100% Extremely likely]

### **Democrat credit**

How much do you agree or disagree with the following statements? [*0 - Strongly Disagree to 100 - Strongly agree.*]

- Joe Biden deserves significant credit for the development and distribution of the COVID-19 vaccine.
- The Democratic Party deserves significant credit for the development and distribution of the COVID-19 vaccine.

### **Democrat want**

How much do you agree with the following statements? [*0 - Strongly Disagree to 100 - Strongly agree.*]

- Joe Biden would want me to get the COVID-19 vaccine.
- The leaders of the Democratic Party would want me to get the COVID-19 vaccine.

### **Expected social norm among Democrats**

- What percentage of Democrats do you think will choose to get a COVID-19 vaccine by the end of August 2021?
